# Supplementary material
Source: publisher figshare collection journal article supplement (https://tandf.figshare.com/ndownloader/files/22506860)
Supplement: Supplementary file 1 [file 22506860]

**Ultrasound assisted eco-friendly synthesis of 3-cinnamoyl coumarins using N,N'-(1,2-phenylene)bis(2-aminobenzamide) dichloro cobalt immobilized on mesoporous Al-SBA-15 as a new and recyclable catalyst**

Zeinab Akbarzadeh and Javad Safaei-Ghomi*

*Department of Organic Chemistry, Faculty of Chemistry, University of Kashan, Kashan, 87317, I.R. Iran*


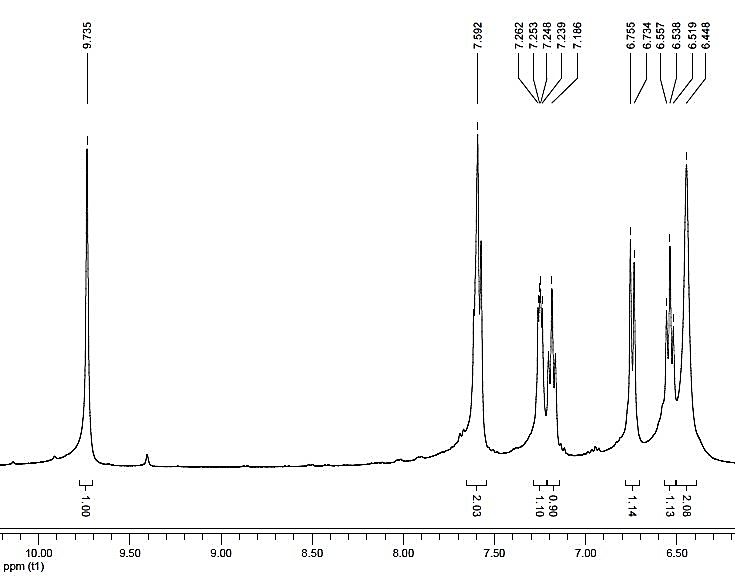


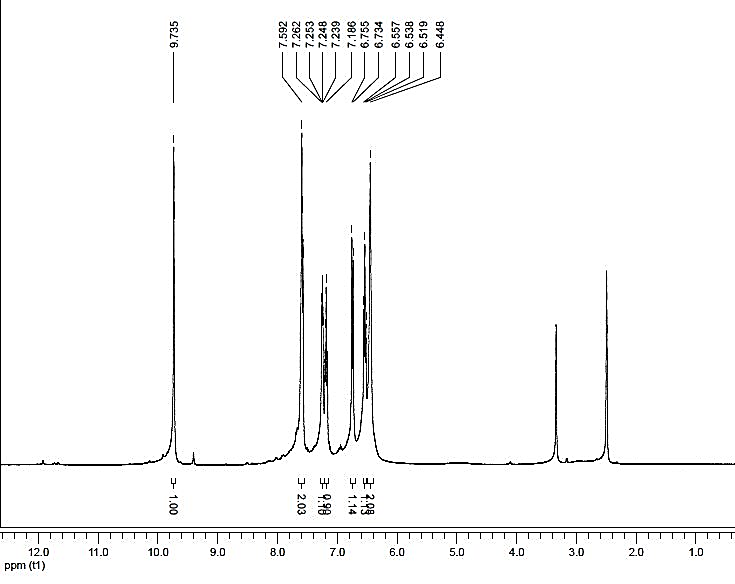


**Fig. S1.** 1HNMR of N,N'-(1,2-phenylene)bis(2-aminobenzamide) ligand in DMSO-d6


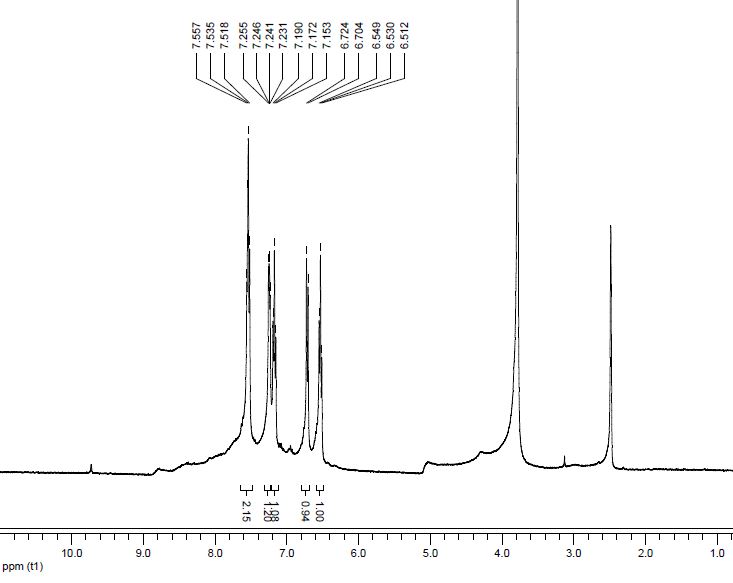


**Fig.S2.** 1HNMR (Exchange with D2O) of N,N'-(1,2-phenylene)bis(2-aminobenzamide) in DMSO-d6


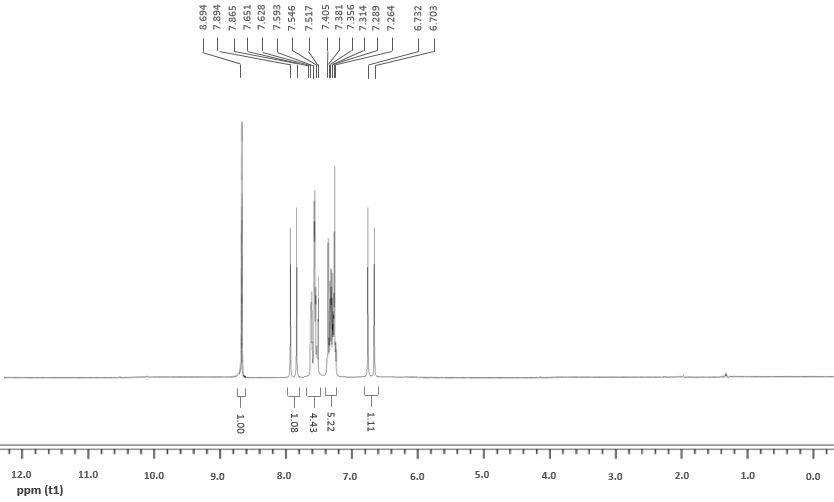


**Fig.S3.** 1H NMR – Compound **4a**


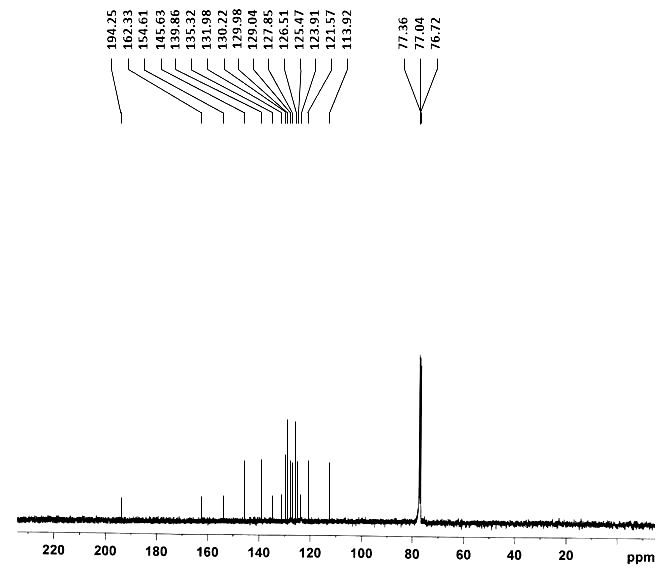


**Fig.S4.** 13C NMR – Compound **4a**


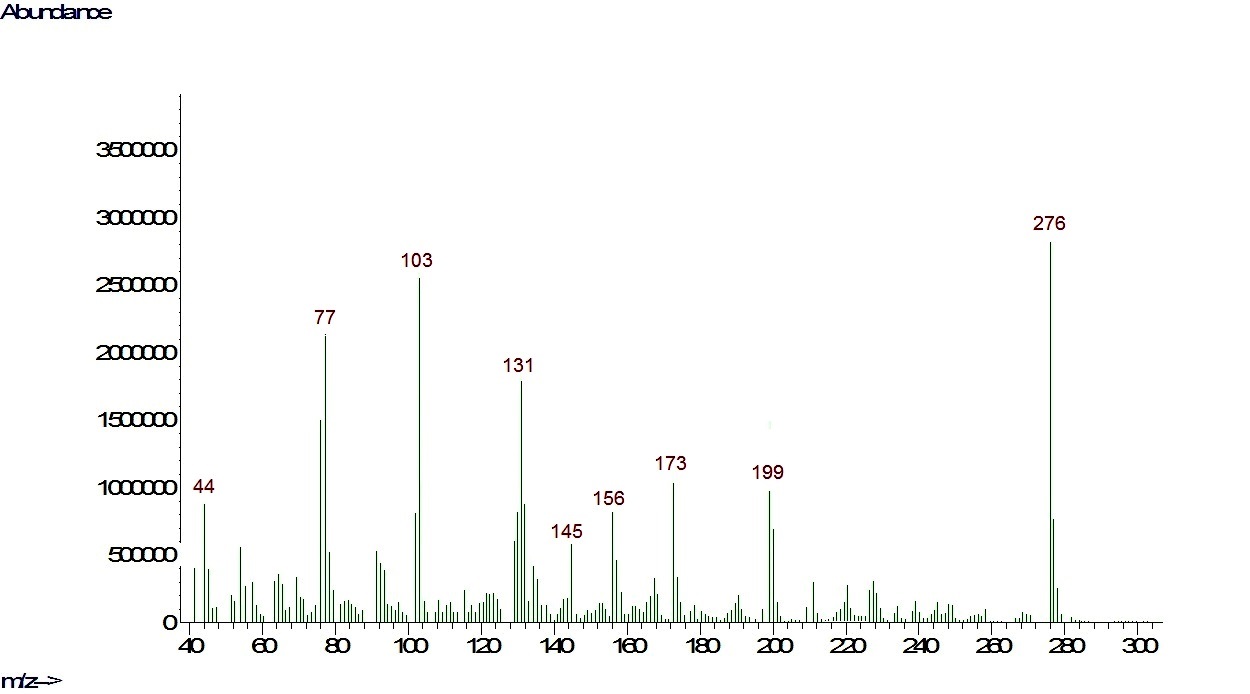
 **Fig.S5. MS** – Compound **4a**


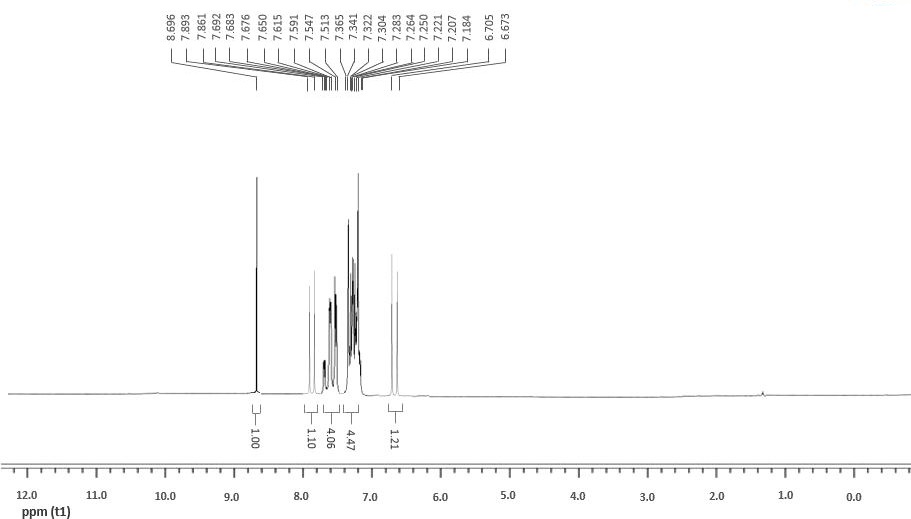


**Fig.S6.** 1H NMR – Compound **4b**


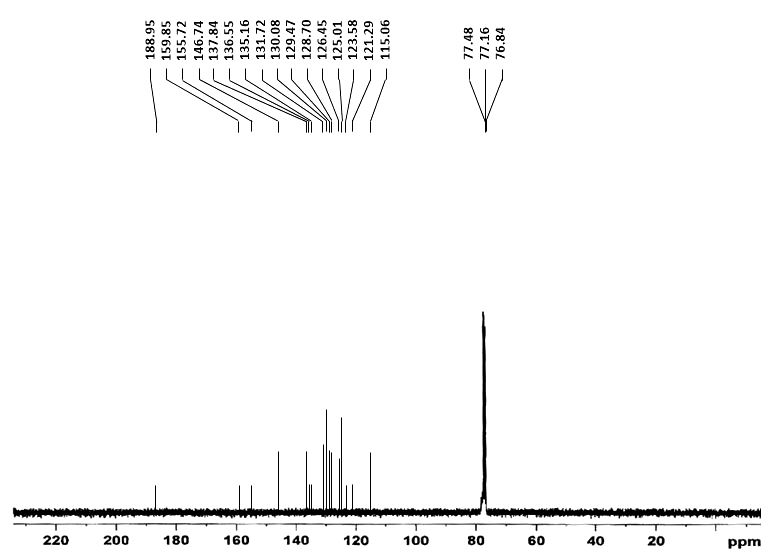


**Fig.S7.** 13C NMR – Compound **4b**


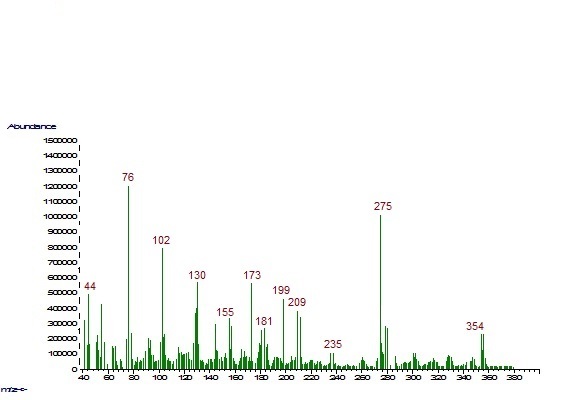


**Fig.S8. MS** – Compound **4b**


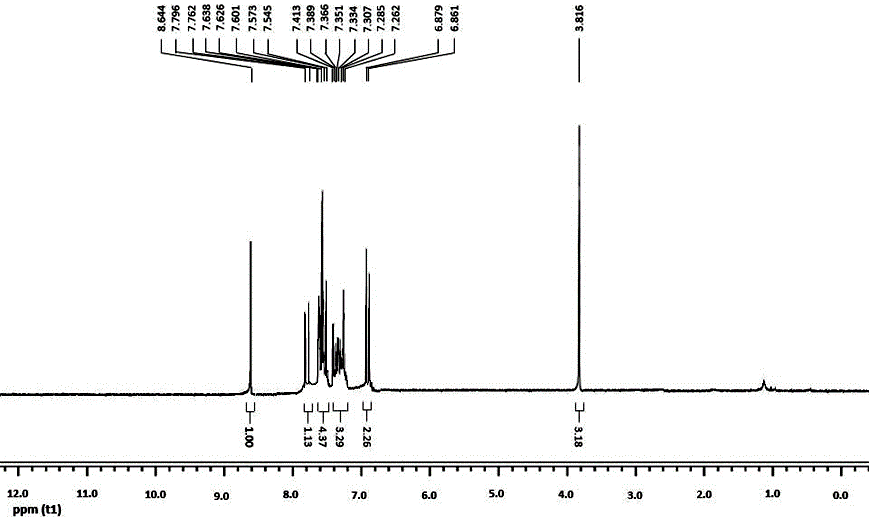


**Fig.S9.** 1H NMR – Compound **4c**


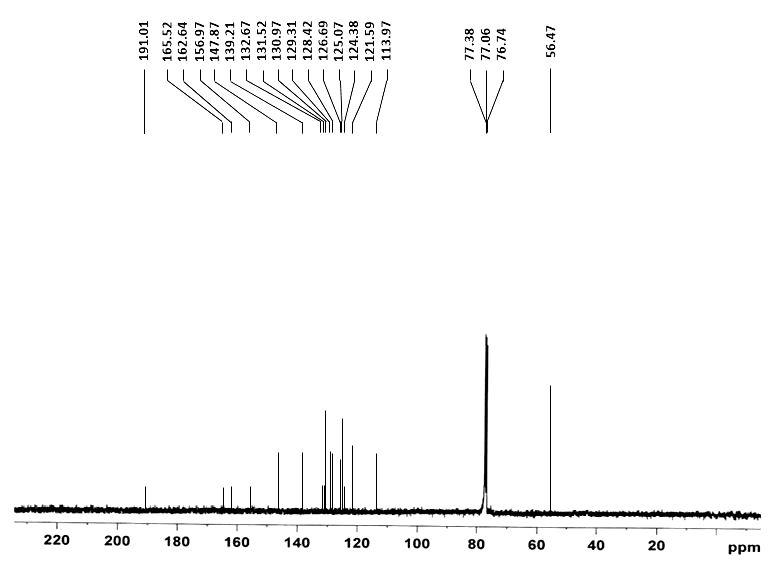


**Fig.S10.** 13C NMR – Compound **4c**


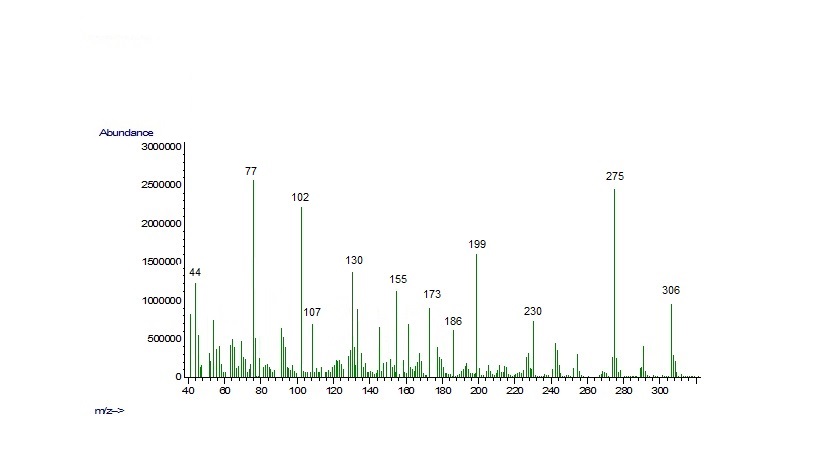


**Fig.S11. MS** – Compound **4c**


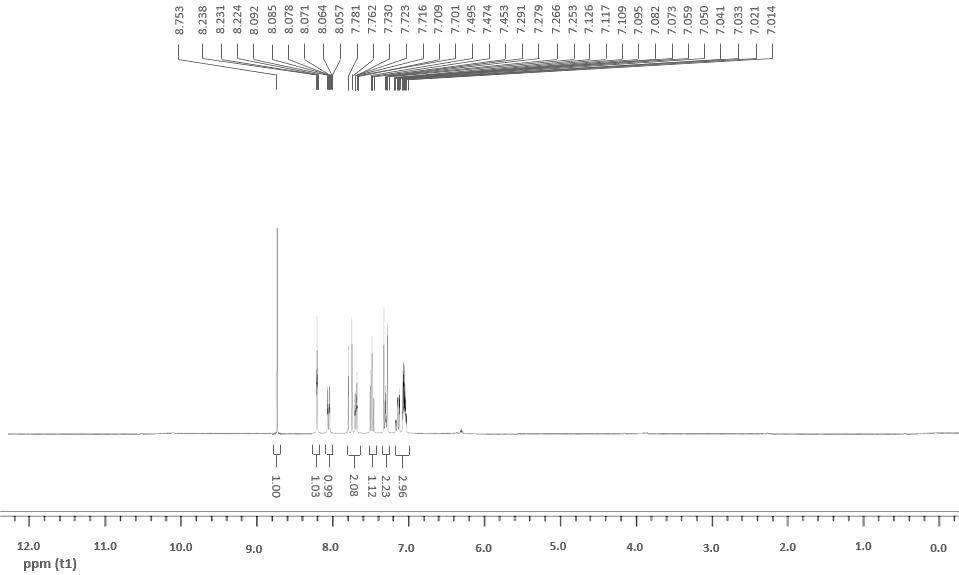


**Fig.S12.** 1H NMR – Compound **4d**


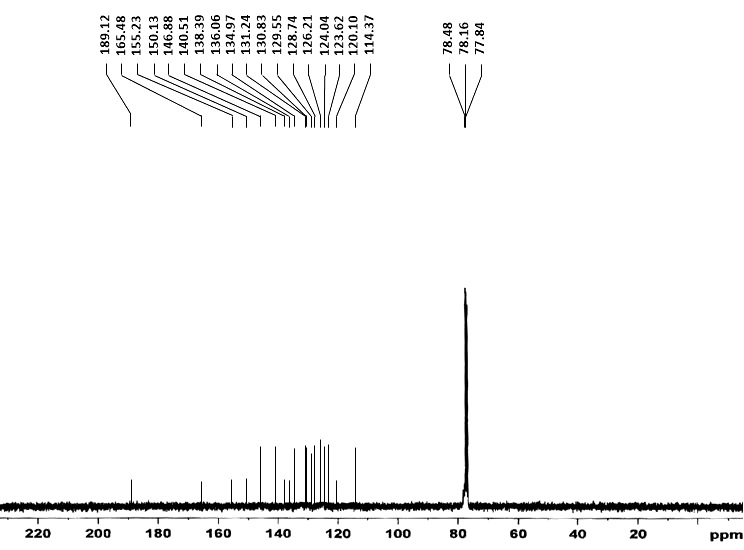


**Fig.S13.** 13C NMR – Compound **4d**


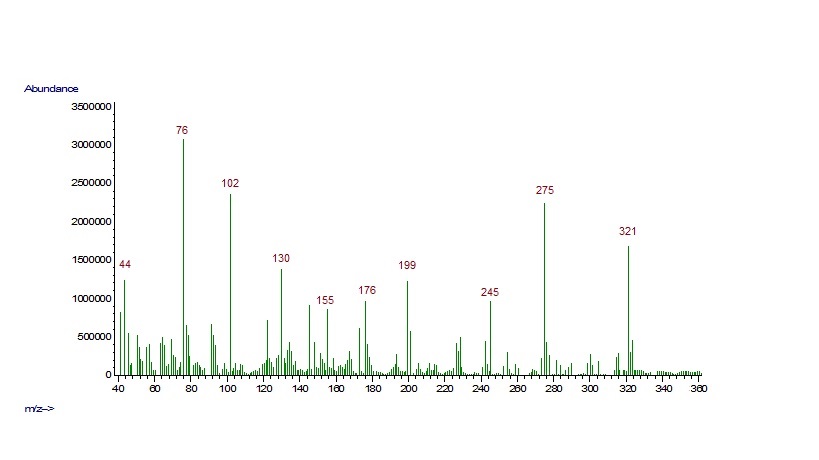


**Fig.S14. MS** – Compound **4d**


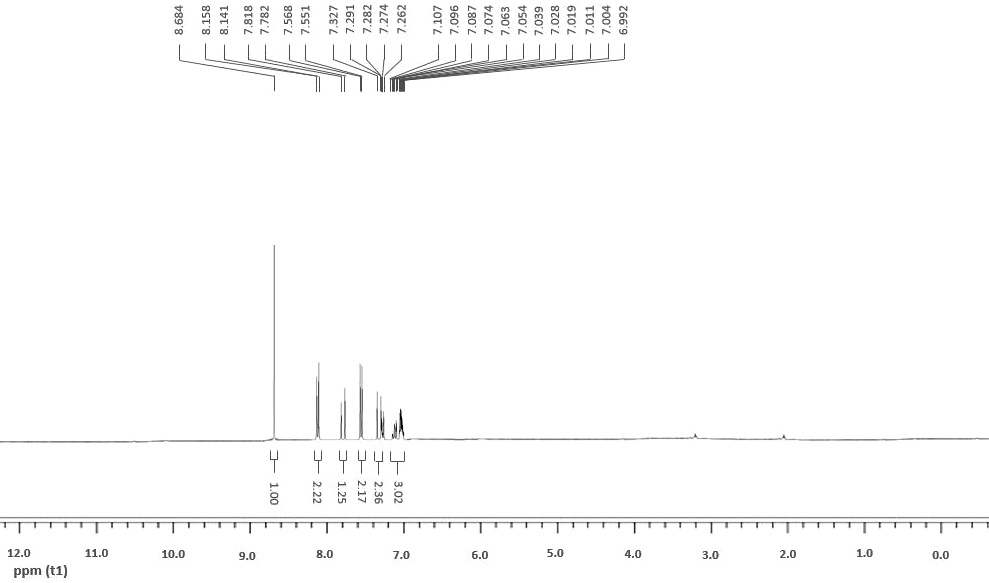


**Fig.S15.** 1H NMR – Compound **4e**


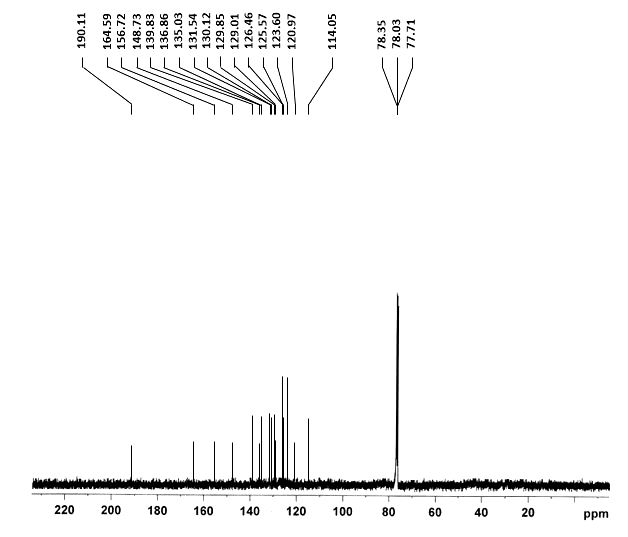


**Fig.S16.** 13C NMR – Compound **4e**


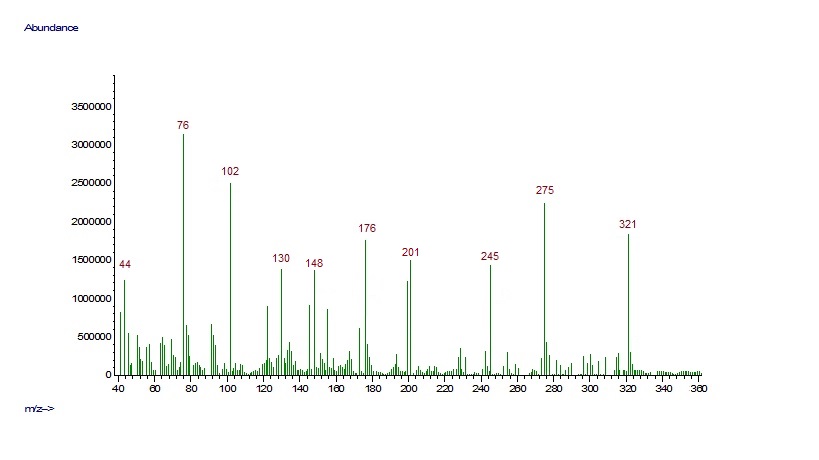


**Fig.S17. MS** – Compound **4e**


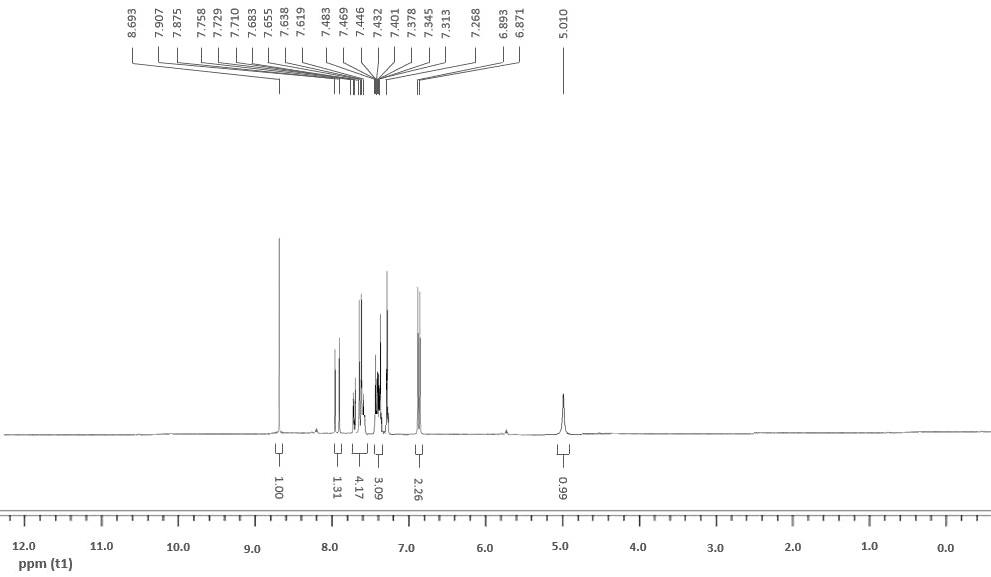


**Fig.S18.** 1H NMR – Compound **4f**


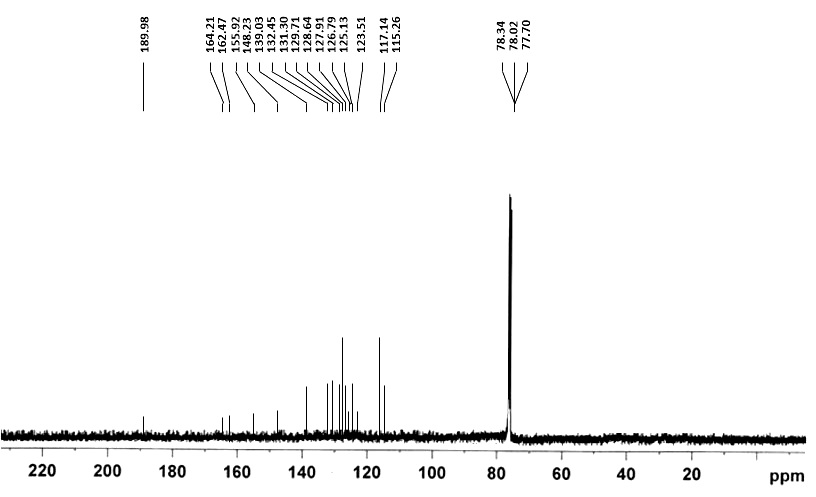


**Fig.S19.** 13C NMR – Compound **4f**

**
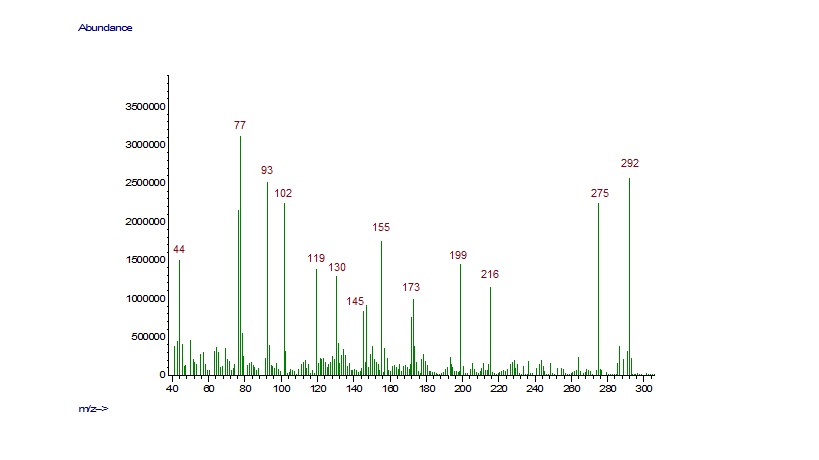
**

**Fig.S20. MS** – Compound **4f**


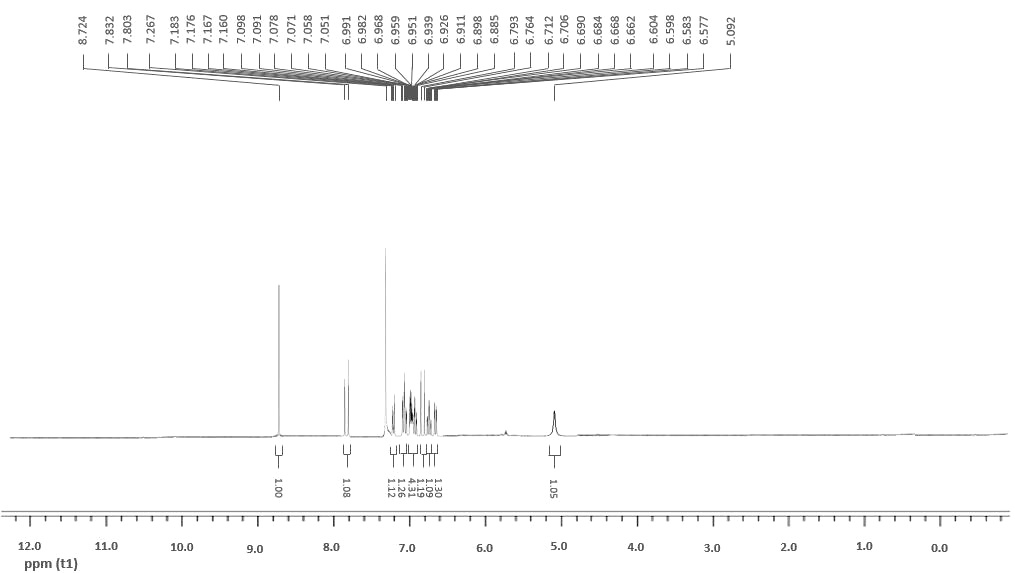


**Fig.S21.** 1H NMR – Compound **4g**

**
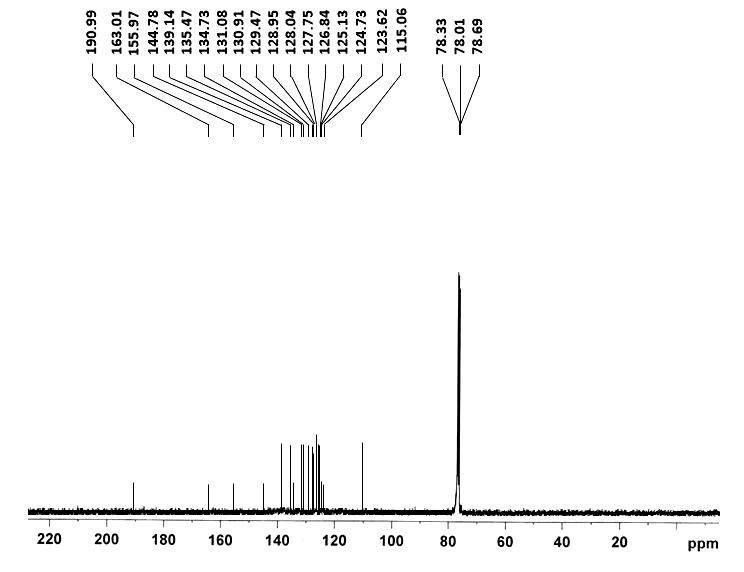
**

**Fig.S22.** 13C NMR – Compound **4g**

**
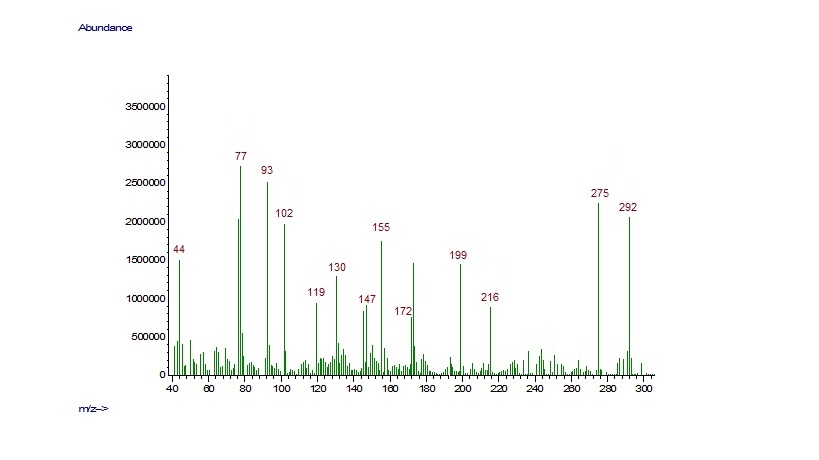
**

**Fig.S23. MS** – Compound **4g**


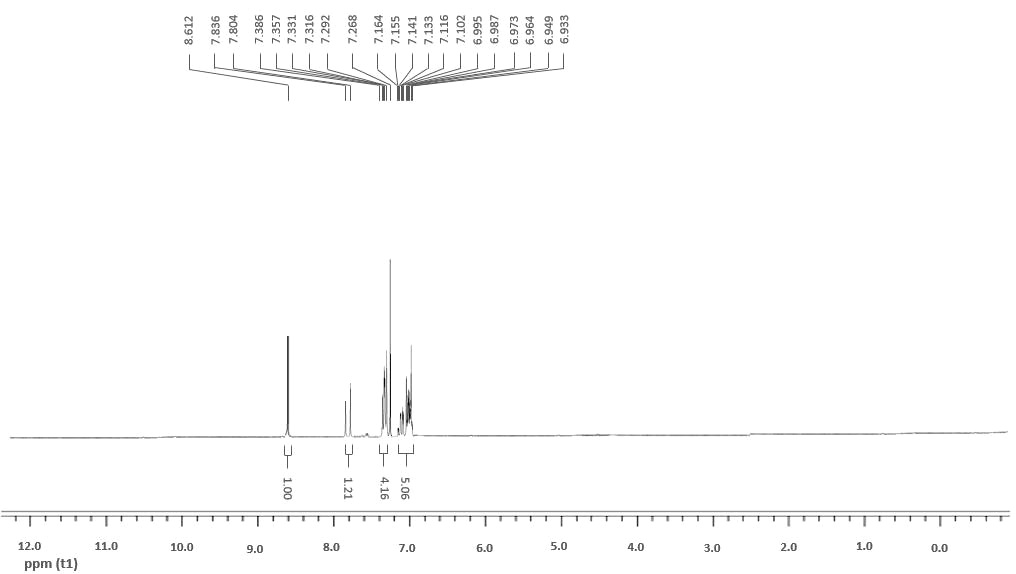


**Fig.S24.** 1H NMR – Compound **4h**

**
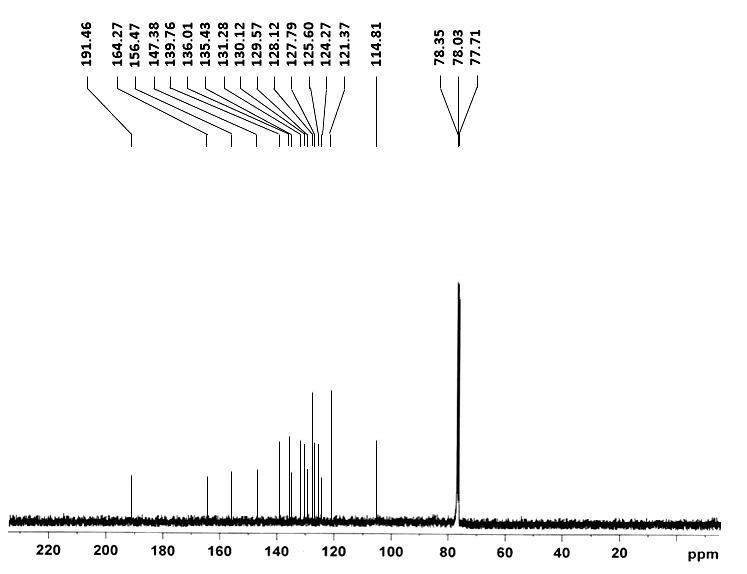
**

**Fig.S25.** 13C NMR – Compound **4h**

**
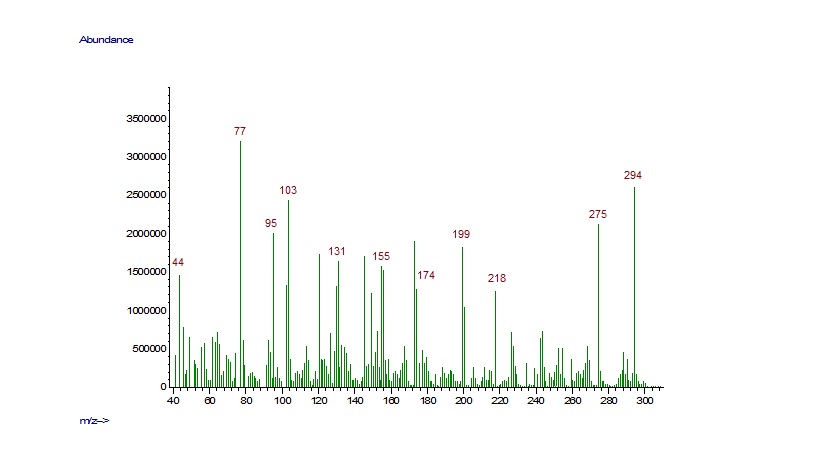
**

**Fig.S26. MS** – Compound **4h**


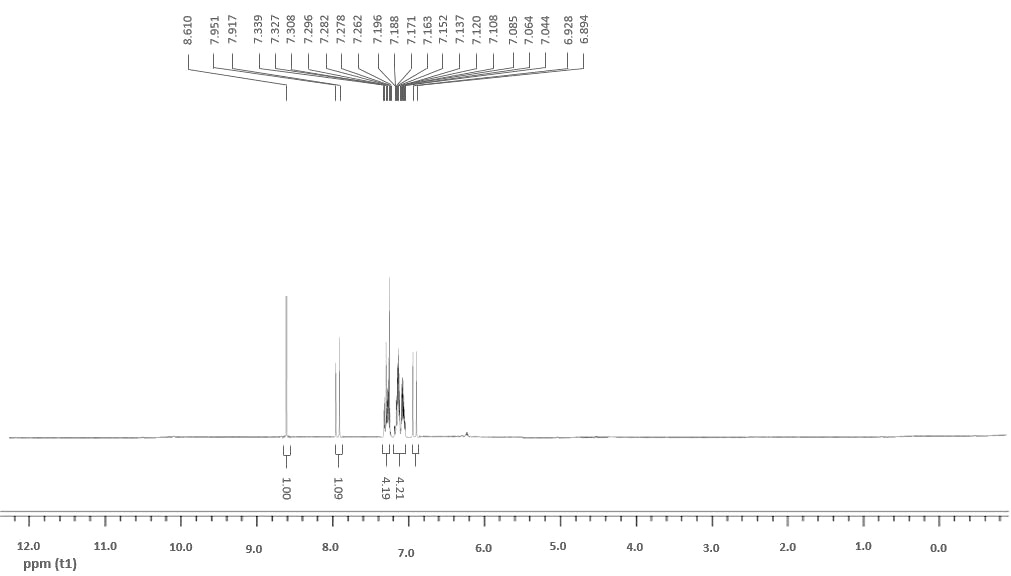


**Fig.S27.** 1H NMR – Compound **4i**

**
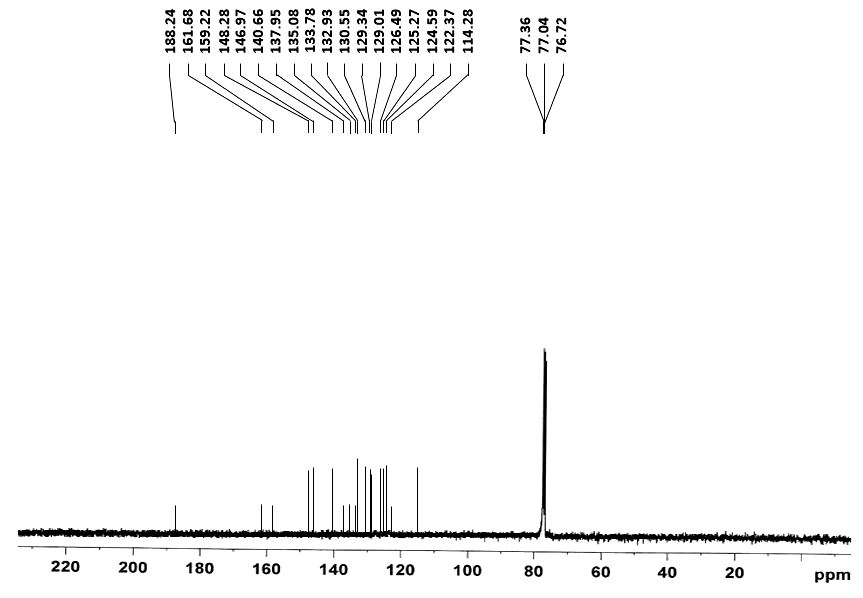
**

**Fig.S28.** 13C NMR – Compound **4i**

**
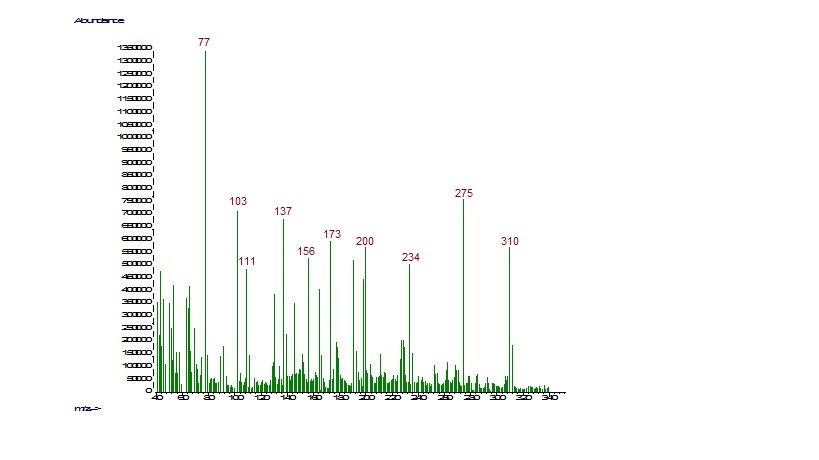
**

**Fig.S29. MS** – Compound **4i**


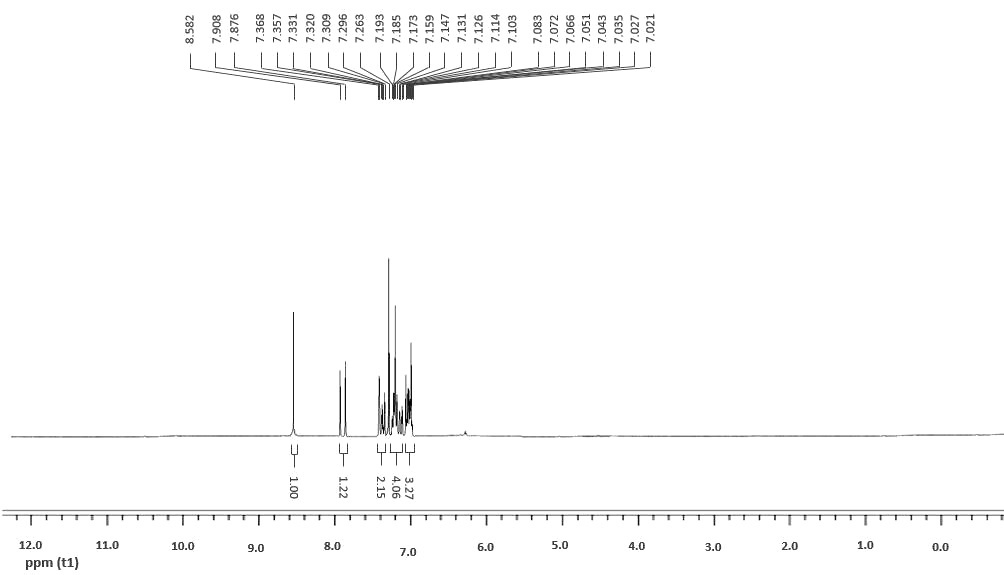


**Fig.S30.** 1H NMR – Compound **4j**

**
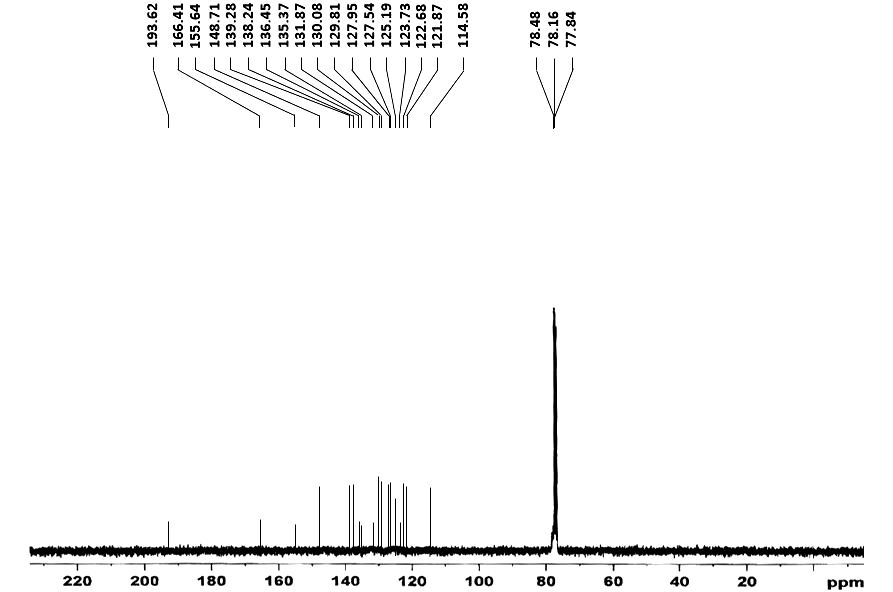
**

**Fig.S31.** 13C NMR – Compound **4j**

**
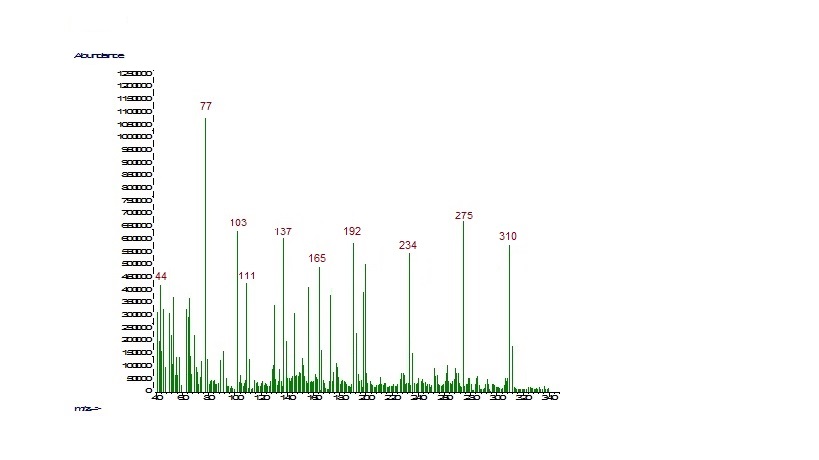
**

**Fig.S32. MS** – Compound **4j**


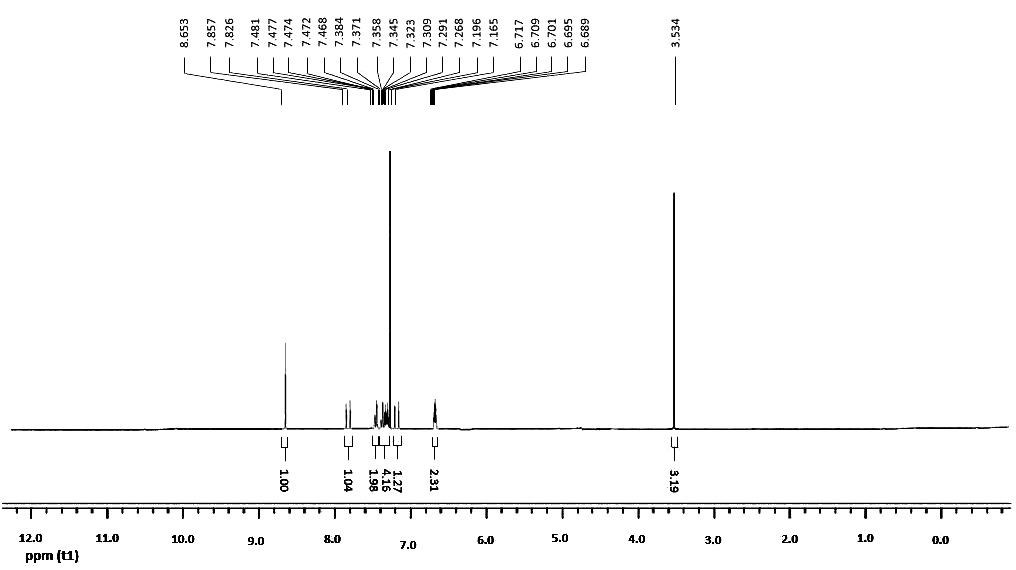


**Fig.S33.** 1H NMR – Compound **4k**

**
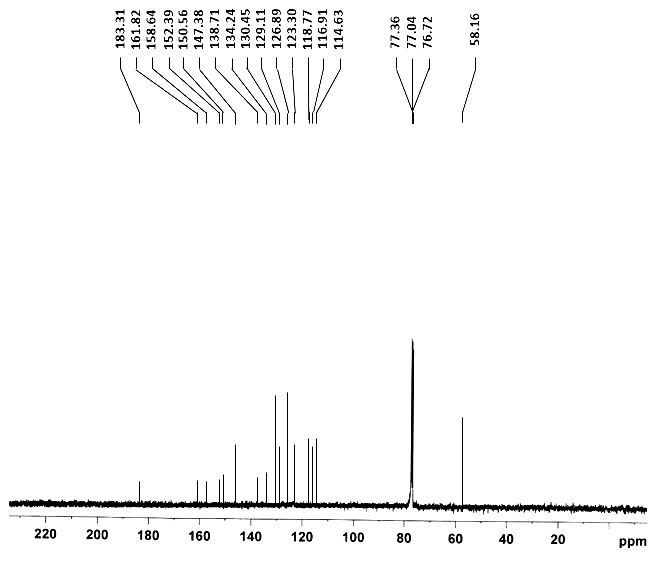
**

**Fig.S34.** 13C NMR – Compound **4k**

**
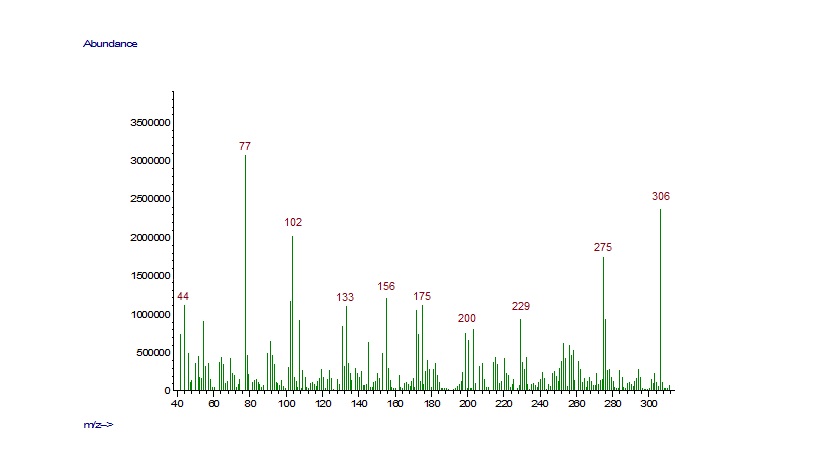
**

**Fig.S35. MS** – Compound **4k**


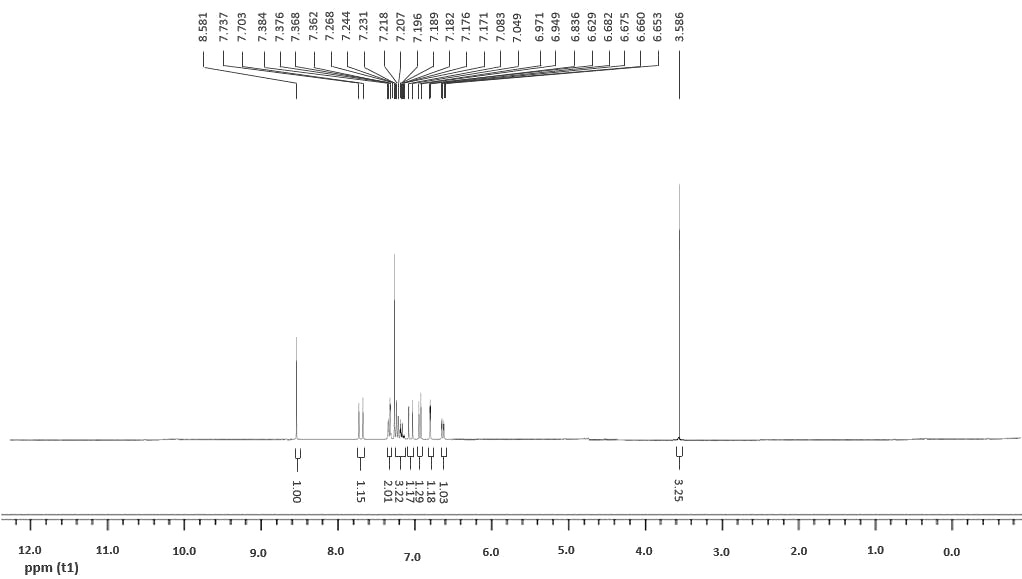


**Fig.S36.** 1H NMR – Compound **4l**

**
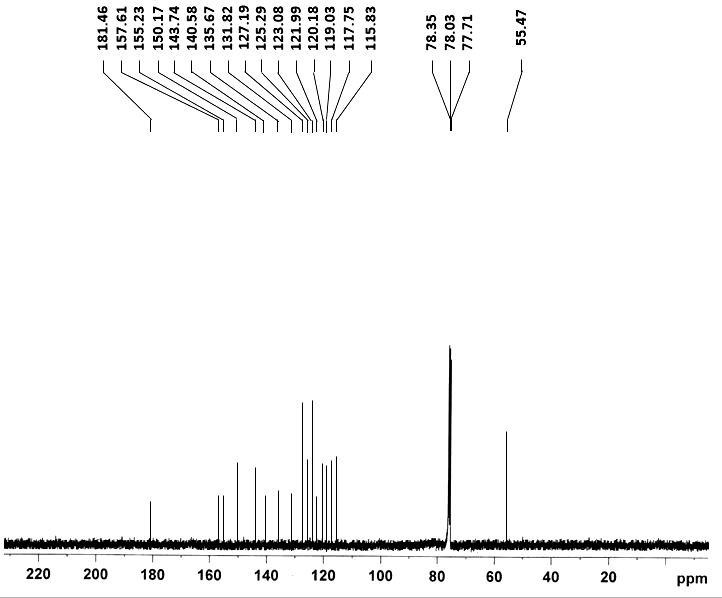
**

**Fig.S37.** 13C NMR – Compound **4l**

**
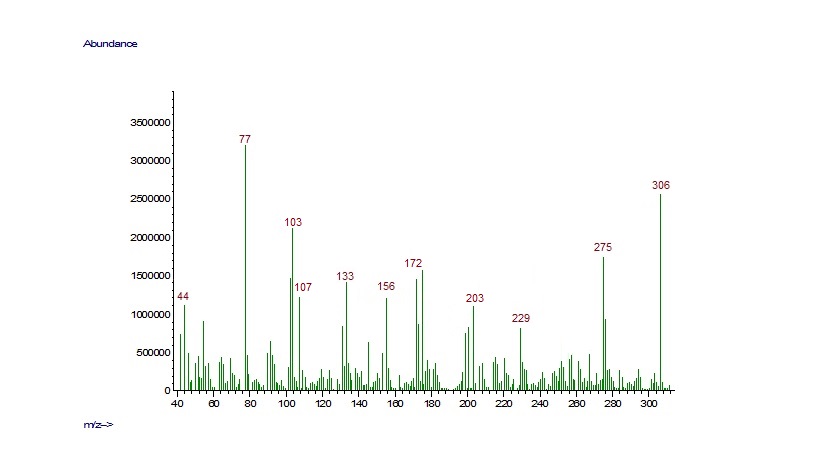
**

**Fig.S38. MS** – Compound **4l**


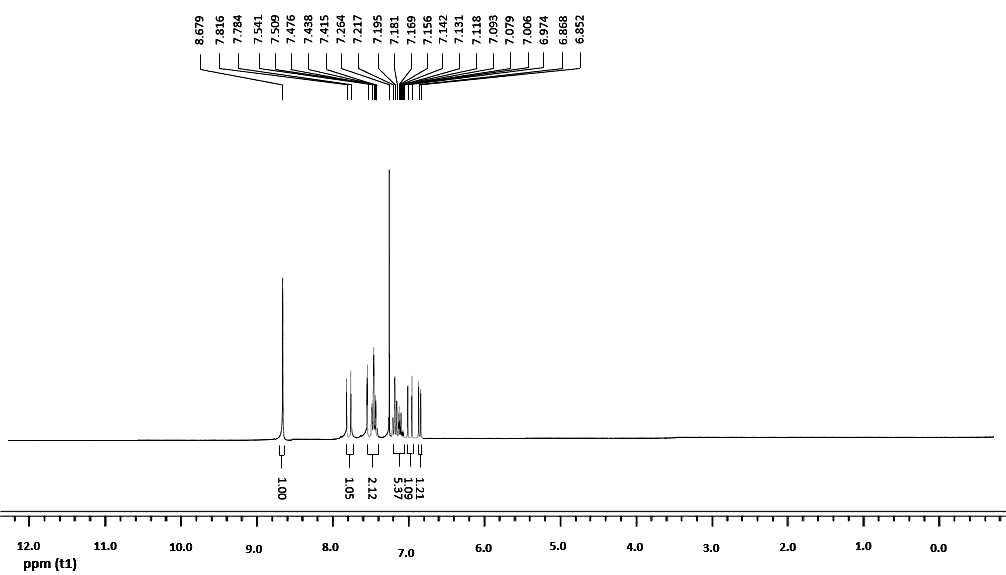


**Fig.S39.** 1H NMR – Compound **4m**

**
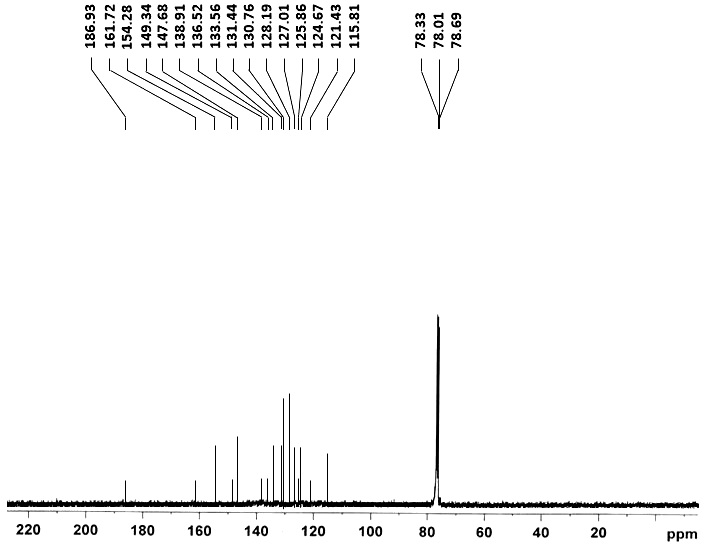
**

**Fig.S40.** 13C NMR – Compound **4m**

**
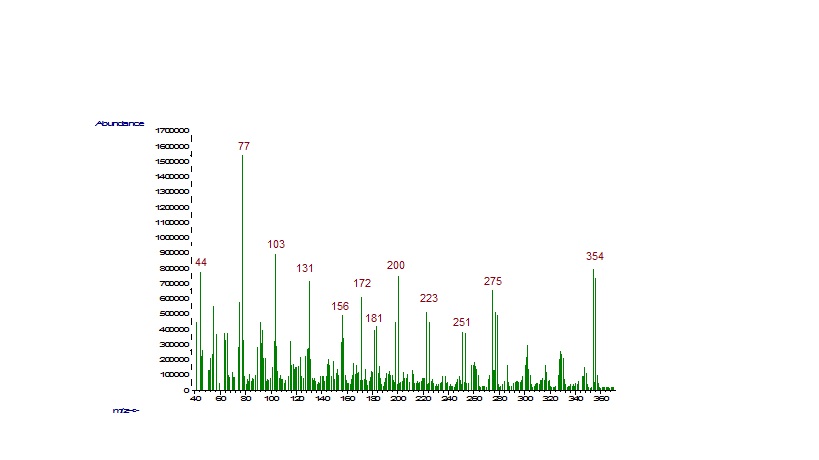
**

**Fig.S41. MS** – Compound **4m**
